# Supplementary material
Source: HighWire-hosted journal article supplement (https://erj.ersjournals.com/content/58/3/2004015)

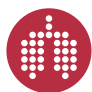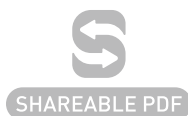

# Medium-term impact of COVID-19 on pulmonary function, functional capacity and quality of life

Fabio Anastasio<sup>1</sup>, Sarah Barbuto<sup>1</sup>, Elisa Scarnecchia<sup>1,2</sup>, Paolo Cosma<sup>1</sup>, Alessandro Fugagnoli<sup>1</sup>, Giulio Rossi<sup>1</sup>, Mirco Parravicini<sup>1</sup> and Pierpaolo Parravicini<sup>1</sup>

<sup>1</sup>ASST Valtellina and Alto Lario, Eugenio Morelli Hospital, Sondalo, Italy. <sup>2</sup>Medical and Surgical Sciences Dept, Alma Mater Studiorum, Bologna University, Bologna, Italy.

Corresponding author: Fabio Anastasio ([fabio.anastasio@asst-val.it](mailto:fabio.anastasio@asst-val.it))

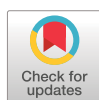

Shareable abstract (@ERSpublications)

COVID-19 severe lung involvement can reduce respiratory performance in the medium- to long-term. Respiratory rehabilitation is recommended in COVID-19 survivors showing severe clinical and radiological signs of disease. <https://bit.ly/3jCxN0s>

**Cite this article as:** Anastasio F, Barbuto S, Scarnecchia E, *et al.* Medium-term impact of COVID-19 on pulmonary function, functional capacity and quality of life. *Eur Respir J* 2021; 58: 2004015 [DOI: 10.1183/13993003.04015-2020].

This single-page version can be shared freely online.

Copyright ©The authors 2021.

This version is distributed under the terms of the Creative Commons Attribution Non-Commercial Licence 4.0. For commercial reproduction rights and permissions contact [permissions@ersnet.org](mailto:permissions@ersnet.org)

Received: 31 Oct 2020

Accepted: 3 Feb 2021

## Abstract

**Background** Coronavirus disease 2019 (COVID-19) has spread worldwide, having a dramatic impact on healthcare systems. The aim of this study is to evaluate mid-term clinical impact of COVID-19 on respiratory function.

**Methods** 379 patients were evaluated 4 months after severe acute respiratory syndrome coronavirus 2 (SARS-CoV-2) diagnosis. Patients were divided in two groups based on the presence of pneumonia during COVID-19. Clinical conditions, quality of life, symptomatology, 6-min walk test, pulmonary function test with spirometry and diffusing capacity of the lung for carbon monoxide were analysed. Data were compared to clinical evolution during COVID-19 (development of acute respiratory distress syndrome, need of invasive mechanical ventilation, partial oxygen saturation ( $S_{pO_2}$ )/inspiratory oxygen fraction ( $F_{IO_2}$ ) ratio and pneumonia severity index (PSI)).

**Results** After a median 135 days, 260 (68.6%) out of 379 patients referred at least one symptom. Patients who developed pneumonia during COVID-19 showed lower  $S_{pO_2}$  at rest ( $p<0.001$ ),  $S_{pO_2}$  during 6-min walk test ( $p<0.001$ ), total lung capacity ( $p<0.001$ ), airway occlusion pressure after 0.1 s ( $P_{0.1}$ ) ( $p=0.02$ ),  $P_{0.1}$ /maximal inspiratory pressure ratio ( $p=0.005$ ) and higher Borg category-ratio scale ( $p=0.006$ ) and modified Medical Research Council breathlessness scale ( $p=0.003$ ), compared to patients without pneumonia.  $S_{pO_2}/F_{IO_2}$  ratio and PSI during SARS-CoV-2 pneumonia were directly associated with mid-term alteration of  $S_{pO_2}$  at rest ( $p<0.001$ ) and during 6-min walk test ( $p<0.001$ ), residual volume ( $p<0.001$ ), total lung capacity ( $p<0.001$  and  $p=0.003$ , respectively) and forced vital capacity ( $p=0.004$  and  $p=0.03$ , respectively).

**Conclusion** Lung damage during COVID-19 correlates to the reduction of pulmonary function 4 months after acute infection.

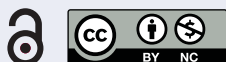

Supplement: inline-supplementary-material-1 [file inline-supplementary-material-1.pdf]
